# Supplementary material for: Chiral nematic porous germania and germanium/carbon films
Source: Royal Society of Chemistry journal article supplement (doi:10.1039/c5nr02520f), 2015-01-01
Supplement: c5nr02520f1.pdf [file c5nr02520f1.pdf]

## Supporting information

### Chiral Nematic Porous Germania and Germanium/Carbon Films

Jing Xu<sup>a</sup>, Thanh-Dinh Nguyen<sup>b</sup>, Kai Xie<sup>a</sup>, Wadood Y. Hamad<sup>c</sup> and Mark J. MacLachlan<sup>\*b</sup>

<sup>a</sup> *Department of Material Science and Engineering, College of Aerospace Science and Engineering, National University of Defense Technology (NUDT), Changsha, Hunan 410073, P. R. China*

<sup>b</sup> *Department of Chemistry, University of British Columbia, 2036 Main Mall, Vancouver, British Columbia, V6T 1Z1, Canada*

<sup>c</sup> *FPInnovations, 2665 East Mall, Vancouver, British Columbia, V6T 1Z4, Canada*

\* Corresponding Author: mmaclach@chem.ubc.ca

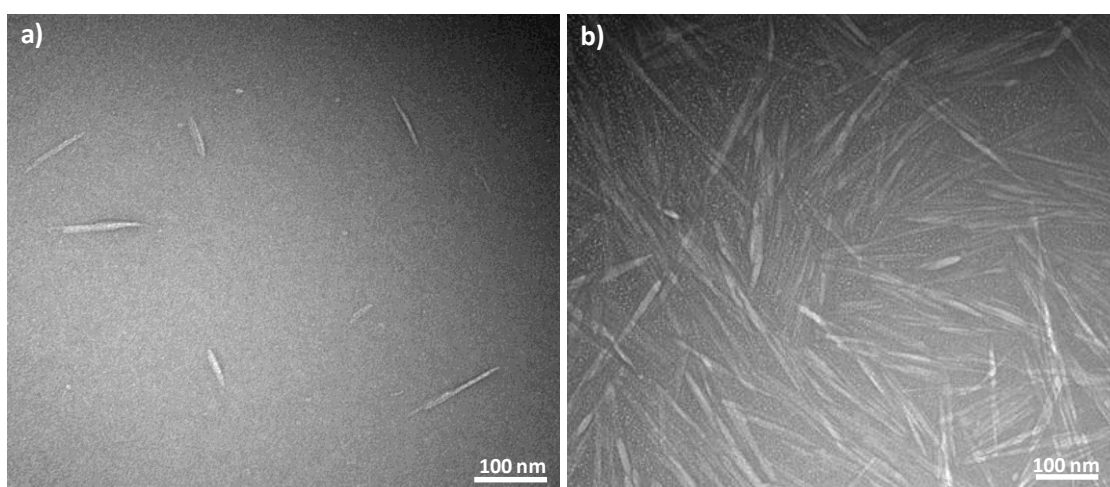

**Figure S1.** TEM images of the aqueous solution of CNCs (0.002 wt%).

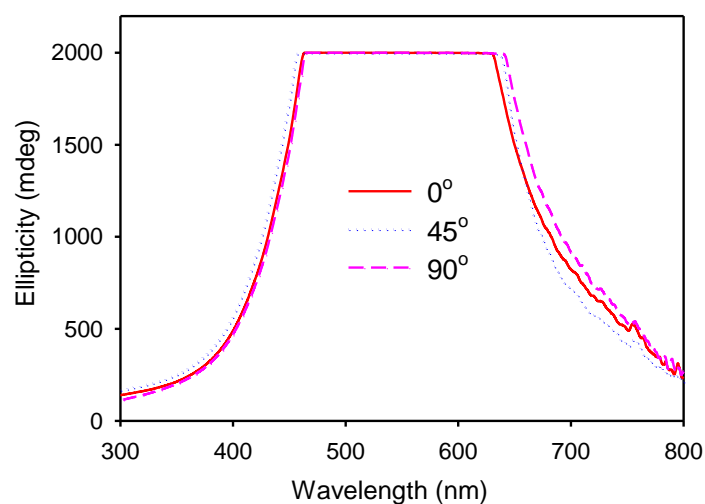

**Figure S2.** CD spectra of a GeO<sub>2</sub>/CNC composite film obtained by rotating the sample from 0° to 90°. No significant change is observed, indicating that the positive signal is not dominated by linear birefringence.

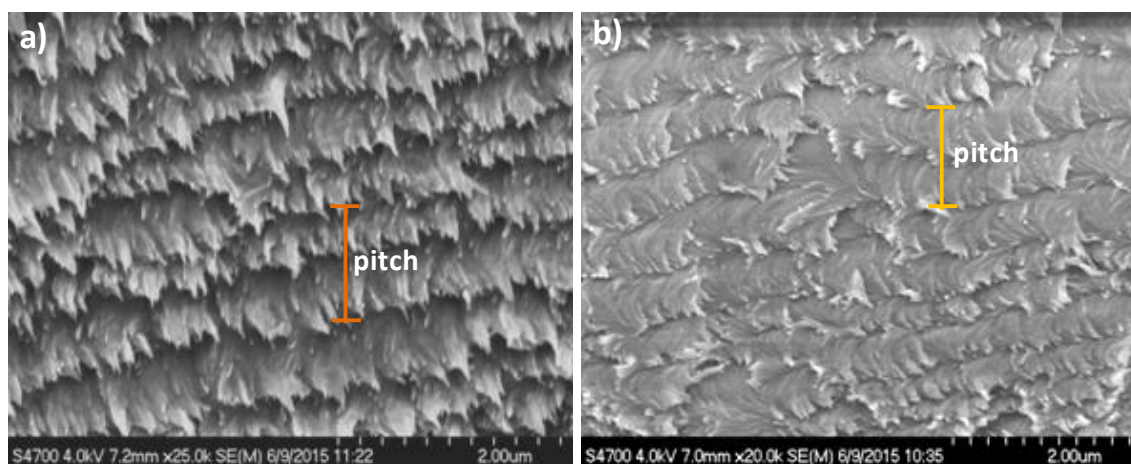

**Figure S3.** SEM images viewed perpendicular to fracture cross-sections of the GeO<sub>2</sub>/CNC composite films prepared using the water/DMF ratio of 1:1 (a) and 1:2 (b).

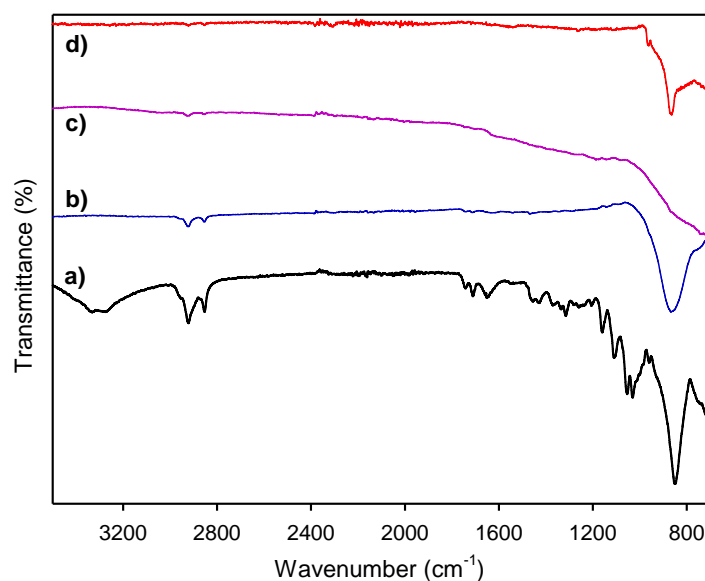

**Figure S4.** FTIR spectra of chiral nematic  $\text{GeO}_2/\text{CNC}$  composite film  $\text{GeO}_2/\text{CNC}$  (a) and the corresponding chiral nematic  $\text{GeO}_2$  films **Ge-A** (b), mesoporous  $\text{Ge}/\text{C}$  composite film **Ge-H** (c) and  $\text{GeO}_2/\text{C}$  composite film **Ge-N** (d).

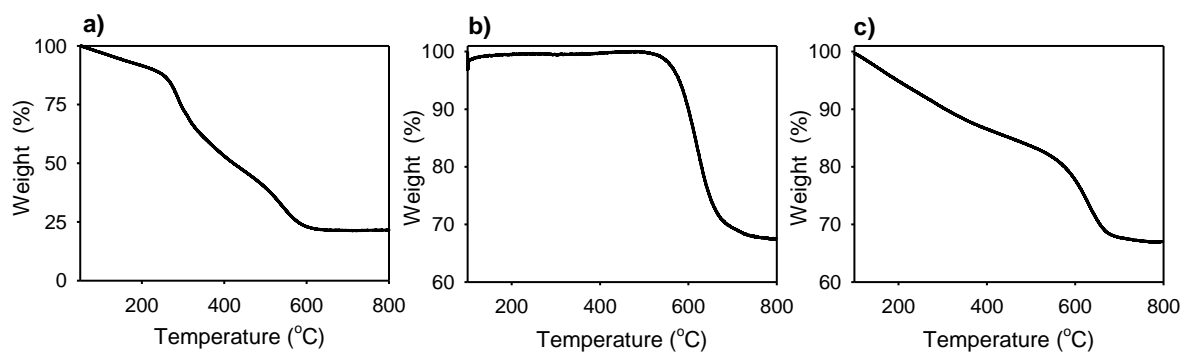

**Figure S5.** TGA curve of (a) the chiral nematic  $\text{GeO}_2/\text{CNC}$  composite film and the corresponding chiral nematic mesoporous (b)  $\text{Ge}/\text{C}$  composite film **Ge-H** and (c)  $\text{GeO}_2/\text{C}$  composite film **Ge-N**.

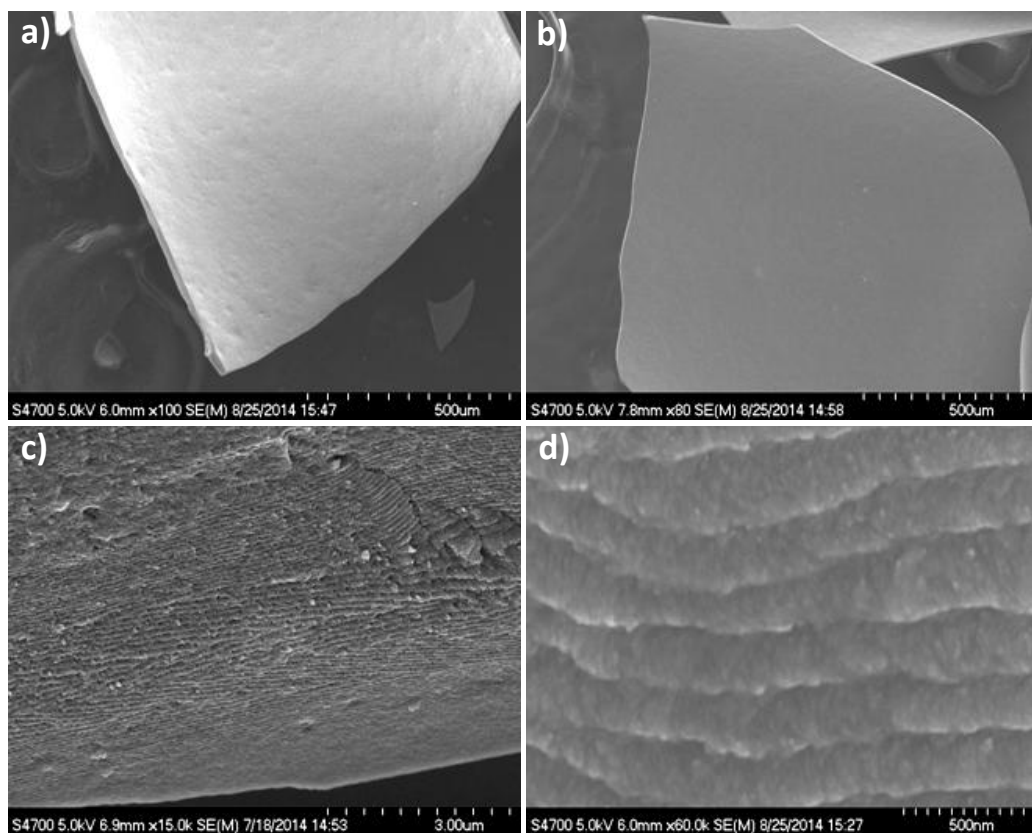

**Figure S6.** Expanded SEM images of chiral nematic  $\text{GeO}_2$  films (**Ge-A**) obtained by calcination of  $\text{GeO}_2/\text{CNC}$  composite films under flowing air. (a,b) The top view with low magnification confirms the smooth surface of  $\text{GeO}_2$  film; (c,d) Under higher magnification, the images viewed along the edges showing the layered twisting structures.

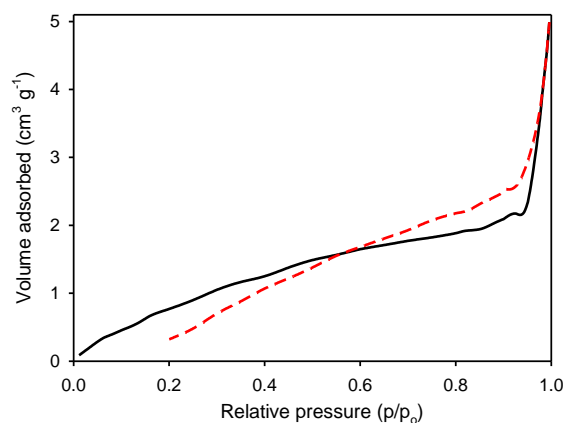

**Figure S7.** N<sub>2</sub> adsorption and desorption isotherms of chiral nematic GeO<sub>2</sub> films (**Ge-A**) obtained from calcination of the GeO<sub>2</sub>/CNC composite film under air. This material has very low surface area.

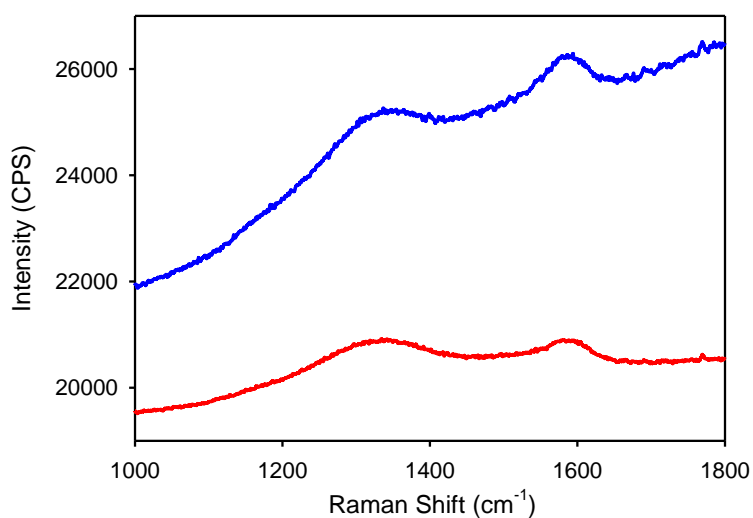

**Figure S8.** Raman spectra of chiral nematic mesoporous Ge/C film (**Ge-H**, blue line) and GeO<sub>2</sub>/C composite film (**Ge-N**, red line).

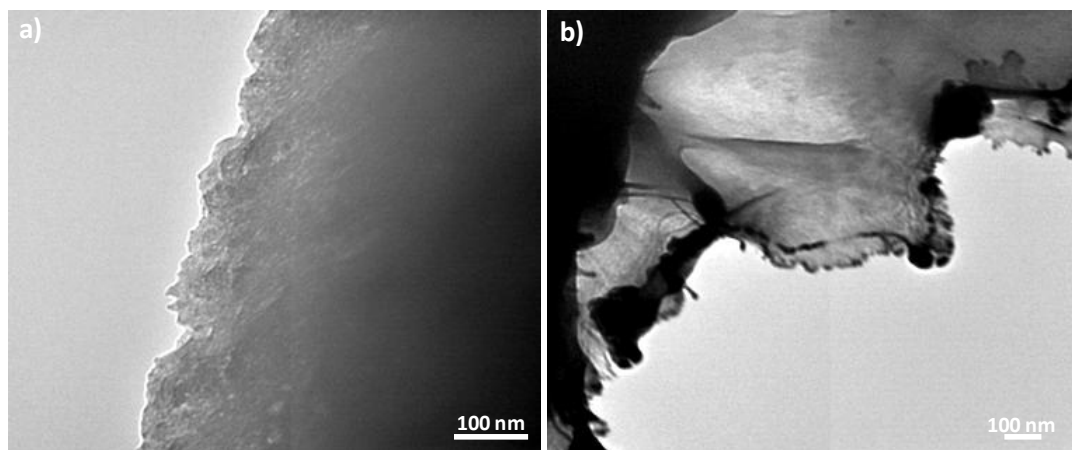

**Figure S9.** Expanded TEM images of GeO<sub>2</sub>/C films (**Ge-N**).
